# Supplementary material for: How Does a Single Cell Know When the Liver Has Reached Its Correct Size?
Source: PubMed Central journal article supplement (PMC3972176; doi:10.1371/journal.pone.0093207), 2014-04-01
Supplement: pone.0093207.s004.pdf [file pone.0093207.s004.pdf]

| Animal-Nr. | OP      | OB-Time | BW(g) | remnant li | LL/BW(%) | AVE%        | SD           | fraction of liver | SD1   |
|------------|---------|---------|-------|------------|----------|-------------|--------------|-------------------|-------|
| 1          | 70%PH   | 24h     | 244   | 3.52       | 1.44     |             |              |                   |       |
| 2          | 70%PH   | 24h     | 292.5 | 5.29       | 1.81     |             |              |                   |       |
| 3          | 70%PH   | 24h     | 309   | 4.56       | 1.48     |             |              |                   |       |
| 4          | 70%PH   | 24h     | 319.5 | 4.92       | 1.54     |             |              |                   |       |
| 5          | 70%PH   | 24h     | 297.5 | 4.42       | 1.49     |             |              |                   |       |
| 6          | 70%PH   | 24h     | 319   | 4.02       | 1.26     | <b>1.50</b> | <b>0.178</b> | 0.455             | 0.054 |
| 7          | 70%PH   | 48h     | 265   | 5.78       | 2.18     |             |              |                   |       |
| 8          | 70%PH   | 48h     | 283   | 6.02       | 2.13     |             |              |                   |       |
| 9          | 70%PH   | 48h     | 297   | 5.95       | 2.00     |             |              |                   |       |
| 10         | 70%PH   | 48h     | 278   | 5.89       | 2.12     |             |              |                   |       |
| 11         | 70%PH   | 48h     | 282   | 5.65       | 2.00     |             |              |                   |       |
| 12         | 70%PH   | 48h     | 269   | 5.86       | 2.18     | <b>2.10</b> | <b>0.081</b> | 0.637             | 0.024 |
| 13         | 70%PH   | 72h     | 284   | 6.89       | 2.43     |             |              |                   |       |
| 14         | 70%PH   | 72h     | 263   | 7.35       | 2.79     |             |              |                   |       |
| 15         | 70%PH   | 72h     | 278   | 7.02       | 2.53     |             |              |                   |       |
| 16         | 70%PH   | 72h     | 280   | 7.25       | 2.59     |             |              |                   |       |
| 17         | 70%PH   | 72h     | 282.5 | 7.25       | 2.57     |             |              |                   |       |
| 18         | 70%PH   | 72h     | 286   | 7.21       | 2.52     | <b>2.57</b> | <b>0.123</b> | 0.779             | 0.037 |
| 19         | 70%PH   | 7d      | 273   | 8.05       | 2.95     |             |              |                   |       |
| 20         | 70%PH   | 7d      | 248   | 8.325      | 3.36     |             |              |                   |       |
| 21         | 70%PH   | 7d      | 250   | 7.865      | 3.15     |             |              |                   |       |
| 22         | 70%PH   | 7d      | 309   | 8.67       | 2.81     |             |              |                   |       |
| 23         | 70%PH   | 7d      | 299.5 | 7.77       | 2.59     |             |              |                   |       |
| 24         | 70%PH   | 7d      | 311   | 7.25       | 2.33     | 2.86        | 0.371        | 0.867             | 0.112 |
| 49         | Sham-OP | 24h     | 288   | 9.85       | 3.42     |             |              |                   |       |
| 50         | Sham-OP | 24h     | 291.5 | 8.72       | 2.99     |             |              |                   |       |
| 51         | Sham-OP | 24h     | 284.5 | 9.92       | 3.49     |             |              |                   |       |
| 52         | Sham-OP | 24h     | 300   | 7.716      | 2.57     |             |              |                   |       |
| 53         | Sham-OP | 24h     | 263.5 | 7.175      | 2.72     |             |              |                   |       |
| 54         | Sham-OP | 24h     | 279   | 7.87       | 2.82     | 3.00        | 0.376        |                   |       |
| 55         | Sham-OP | 48h     | 285   | 10.09      | 3.54     |             |              |                   |       |
| 56         | Sham-OP | 48h     | 270.5 | 9.1        | 3.36     |             |              |                   |       |
| 57         | Sham-OP | 48h     | 271.5 | 8.62       | 3.17     |             |              |                   |       |
| 58         | Sham-OP | 48h     | 295   | 9.39       | 3.18     |             |              |                   |       |
| 59         | Sham-OP | 48h     | 299   | 9.56       | 3.20     |             |              |                   |       |
| 60         | Sham-OP | 48h     | 299.5 | 10.3       | 3.44     | 3.32        | 0.155        |                   |       |
| 61         | Sham-OP | 72h     | 298.5 | 10.45      | 3.50     |             |              |                   |       |
| 62         | Sham-OP | 72h     | 296   | 10.38      | 3.51     |             |              |                   |       |
| 63         | Sham-OP | 72h     | 298.5 | 10.62      | 3.56     |             |              |                   |       |
| 64         | Sham-OP | 72h     | 274.5 | 10.045     | 3.66     |             |              |                   |       |
| 65         | Sham-OP | 72h     | 239.5 | 9.7        | 4.05     |             |              |                   |       |
| 66         | Sham-OP | 72h     | 288   | 8.765      | 3.04     | 3.55        | 0.323        |                   |       |
| 67         | Sham-OP | 7d      | 262   | 9.735      | 3.72     |             |              |                   |       |
| 68         | Sham-OP | 7d      | 255   | 11.247     | 4.41     |             |              |                   |       |
| 69         | Sham-OP | 7d      | 251.5 | 9.486      | 3.77     |             |              |                   |       |
| 70         | Sham-OP | 7d      | 331   | 8.447      | 2.55     |             |              |                   |       |
| 71         | Sham-OP | 7d      | 350.5 | 9.389      | 2.68     |             |              |                   |       |
| 72         | Sham-OP | 7d      | 335   | 9.646      | 2.88     | 3.33        | 0.741        | 3.30              |       |

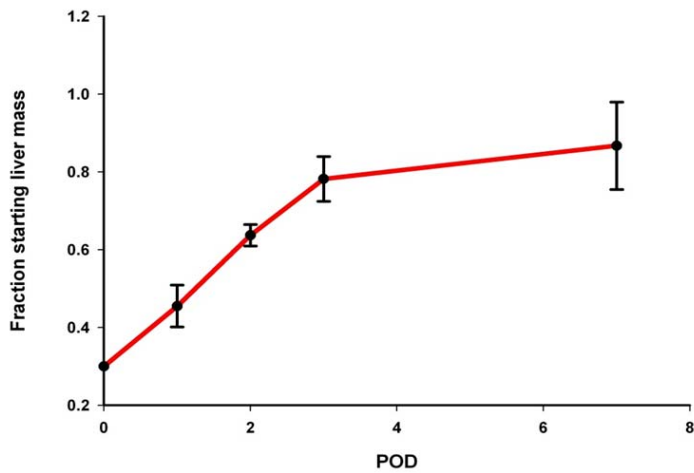

Graph produced by Sigmaplot 10.0

| Animal ID | OP      | servati | BW    | RL    | Remnant | LLL+ML | CL    | LLL+ML% | AVE(1) | SD(1) | CL%   | AVE(2) | SD(2) | RL%   | AVE(3) | SD(3) |
|-----------|---------|---------|-------|-------|---------|--------|-------|---------|--------|-------|-------|--------|-------|-------|--------|-------|
| 25        | 70%PVL  | 24h     | 253.5 | 1.680 | 7.500   | 4.61   | 0.76  | 1.819   | 1.900  | 0.087 | 0.300 | 0.304  | 0.009 | 0.663 | 0.701  | 0.058 |
| 26        | 70%PVL  | 24h     | 269   | 2.170 | 8.860   | 5.45   | 0.85  | 2.026   |        |       | 0.316 |        |       | 0.807 |        |       |
| 27        | 70%PVL  | 24h     | 282.5 | 1.800 | 8.350   | 5.23   | 0.84  | 1.851   |        |       | 0.297 |        |       | 0.637 |        |       |
| 28        | 70%PVL  | 24h     | 263   | 1.851 | 8.780   | 5.03   | 0.79  | 1.913   |        |       | 0.300 |        |       | 0.704 |        |       |
| 29        | 70%PVL  | 24h     | 268   | 1.848 | 8.763   | 4.87   | 0.79  | 1.817   |        |       | 0.295 |        |       | 0.690 |        |       |
| 30        | 70%PVL  | 24h     | 264   | 1.870 | 9.012   | 5.22   | 0.83  | 1.977   |        |       | 0.314 |        |       | 0.708 |        |       |
| 31        | 70%PVL  | 48h     | 268   | 2.860 | 8.593   | 4.259  | 0.891 | 1.589   | 1.507  | 0.054 | 0.332 | 0.354  | 0.029 | 1.067 | 0.953  | 0.069 |
| 32        | 70%PVL  | 48h     | 270   | 2.640 | 8.284   | 4.173  | 0.917 | 1.546   |        |       | 0.340 |        |       | 0.978 |        |       |
| 33        | 70%PVL  | 48h     | 270   | 2.651 | 8.575   | 4.093  | 1.107 | 1.516   |        |       | 0.410 |        |       | 0.982 |        |       |
| 34        | 70%PVL  | 48h     | 281   | 2.523 | 8.650   | 4.051  | 0.951 | 1.442   |        |       | 0.338 |        |       | 0.898 |        |       |
| 35        | 70%PVL  | 48h     | 286   | 2.566 | 8.672   | 4.21   | 0.981 | 1.472   |        |       | 0.343 |        |       | 0.897 |        |       |
| 36        | 70%PVL  | 48h     | 278   | 2.485 | 8.564   | 4.108  | 1.006 | 1.478   |        |       | 0.362 |        |       | 0.894 |        |       |
| 37        | 70%PVL  | 72h     | 305.5 | 3.683 | 10.372  | 3.89   | 1.509 | 1.273   | 1.299  | 0.143 | 0.494 | 0.468  | 0.040 | 1.206 | 1.166  | 0.136 |
| 38        | 70%PVL  | 72h     | 299   | 2.796 | 8.970   | 3.857  | 1.463 | 1.290   |        |       | 0.489 |        |       | 0.935 |        |       |
| 39        | 70%PVL  | 72h     | 290.5 | 3.292 | 10.356  | 4.589  | 1.351 | 1.580   |        |       | 0.465 |        |       | 1.133 |        |       |
| 40        | 70%PVL  | 72h     | 274   | 3.611 | 9.603   | 3.445  | 1.416 | 1.257   |        |       | 0.517 |        |       | 1.318 |        |       |
| 41        | 70%PVL  | 72h     | 250   | 2.824 | 7.664   | 3.023  | 1.071 | 1.209   |        |       | 0.428 |        |       | 1.130 |        |       |
| 42        | 70%PVL  | 72h     | 256   | 3.260 | 8.007   | 3.035  | 1.057 | 1.186   |        |       | 0.413 |        |       | 1.273 |        |       |
| 43        | 70%PVL  | 7d      | 259   | 5.400 | 10.296  | 1.954  | 2.072 | 0.754   | 0.615  | 0.082 | 0.800 | 0.737  | 0.109 | 2.085 | 1.846  | 0.126 |
| 44        | 70%PVL  | 7d      | 270.5 | 4.905 | 8.456   | 1.431  | 1.652 | 0.529   |        |       | 0.611 |        |       | 1.813 |        |       |
| 45        | 70%PVL  | 7d      | 264.5 | 4.921 | 9.808   | 1.758  | 2.116 | 0.665   |        |       | 0.800 |        |       | 1.860 |        |       |
| 46        | 70%PVL  | 7d      | 271   | 4.824 | 8.642   | 1.64   | 2.176 | 0.605   |        |       | 0.803 |        |       | 1.780 |        |       |
| 47        | 70%PVL  | 7d      | 286   | 4.916 | 8.546   | 1.641  | 1.982 | 0.574   |        |       | 0.693 |        |       | 1.719 |        |       |
| 48        | 70%PVL  | 7d      | 279   | 5.068 | 8.620   | 1.57   | 1.993 | 0.563   |        |       | 0.714 |        |       | 1.816 |        |       |
| 49        | Sham-OP | 24h     | 288   | 1.73  | 9.85    | 6.72   | 0.78  | 2.333   | 2.086  | 0.287 | 0.271 | 0.245  | 0.028 | 0.601 | 0.569  | 0.055 |
| 50        | Sham-OP | 24h     | 291.5 | 1.74  | 8.72    | 6.35   | 0.75  | 2.178   |        |       | 0.257 |        |       | 0.597 |        |       |
| 51        | Sham-OP | 24h     | 284.5 | 1.77  | 9.92    | 6.79   | 0.69  | 2.387   |        |       | 0.243 |        |       | 0.622 |        |       |
| 52        | Sham-OP | 24h     | 300   | 1.68  | 7.716   | 4.793  | 0.778 | 1.598   |        |       | 0.259 |        |       | 0.560 |        |       |
| 53        | Sham-OP | 24h     | 263.5 | 1.234 | 7.175   | 5.223  | 0.505 | 1.982   |        |       | 0.192 |        |       | 0.468 |        |       |
| 54        | Sham-OP | 24h     | 279   | 1.571 | 7.87    | 5.68   | 0.69  | 2.036   |        |       | 0.247 |        |       | 0.563 |        |       |
| 55        | Sham-OP | 48h     | 285   | 1.71  | 10.09   | 7.11   | 0.71  | 2.495   | 2.182  | 0.208 | 0.249 | 0.236  | 0.013 | 0.600 | 0.586  | 0.058 |
| 56        | Sham-OP | 48h     | 270.5 | 1.73  | 9.1     | 6.28   | 0.67  | 2.322   |        |       | 0.248 |        |       | 0.640 |        |       |
| 57        | Sham-OP | 48h     | 271.5 | 1.8   | 8.62    | 5.92   | 0.63  | 2.180   |        |       | 0.232 |        |       | 0.663 |        |       |
| 58        | Sham-OP | 48h     | 335   | 1.894 | 9.36    | 6.335  | 0.744 | 1.891   |        |       | 0.222 |        |       | 0.565 |        |       |
| 59        | Sham-OP | 48h     | 339   | 1.748 | 10.12   | 7.064  | 0.824 | 2.084   |        |       | 0.243 |        |       | 0.516 |        |       |
| 60        | Sham-OP | 48h     | 320.5 | 1.711 | 9.54    | 6.795  | 0.708 | 2.120   |        |       | 0.221 |        |       | 0.534 |        |       |
| 61        | Sham-OP | 72h     | 298.5 | 1.858 | 10.045  | 7.019  | 0.737 | 2.351   | 2.409  | 0.287 | 0.247 | 0.259  | 0.061 | 0.622 | 0.641  | 0.095 |
| 62        | Sham-OP | 72h     | 296   | 1.658 | 9.7     | 6.807  | 0.725 | 2.300   |        |       | 0.245 |        |       | 0.560 |        |       |
| 63        | Sham-OP | 72h     | 298.5 | 1.547 | 8.765   | 6.192  | 0.543 | 2.074   |        |       | 0.182 |        |       | 0.518 |        |       |
| 64        | Sham-OP | 72h     | 274.5 | 2.05  | 10.309  | 7.207  | 0.656 | 2.626   |        |       | 0.239 |        |       | 0.747 |        |       |
| 65        | Sham-OP | 72h     | 239.5 | 1.793 | 9.832   | 6.865  | 0.882 | 2.866   |        |       | 0.368 |        |       | 0.749 |        |       |
| 66        | Sham-OP | 72h     | 288   | 1.874 | 9.443   | 6.45   | 0.779 | 2.240   |        |       | 0.270 |        |       | 0.651 |        |       |
| 67        | Sham-OP | 7d      | 262   | 1.761 | 9.735   | 6.902  | 0.763 | 2.634   | 2.339  | 0.546 | 0.291 | 0.248  | 0.029 | 0.672 | 0.584  | 0.129 |
| 68        | Sham-OP | 7d      | 255   | 1.811 | 11.247  | 8.008  | 0.664 | 3.140   |        |       | 0.260 |        |       | 0.710 |        |       |
| 69        | Sham-OP | 7d      | 251.5 | 1.778 | 9.486   | 6.649  | 0.672 | 2.644   |        |       | 0.267 |        |       | 0.707 |        |       |
| 70        | Sham-OP | 7d      | 331   | 1.422 | 8.447   | 6.064  | 0.719 | 1.832   |        |       | 0.217 |        |       | 0.430 |        |       |
| 71        | Sham-OP | 7d      | 350.5 | 1.578 | 9.389   | 6.383  | 0.791 | 1.821   |        |       | 0.226 |        |       | 0.450 |        |       |
| 72        | Sham-OP | 7d      | 335   | 1.789 | 9.646   | 6.575  | 0.757 | 1.963   |        |       | 0.226 |        |       | 0.534 |        |       |

| POD | ML-LLL  |       | CL    |       | RL          |        |
|-----|---------|-------|-------|-------|-------------|--------|
|     | AVE     | SD    | AVE   | SD    | AVE         | SD     |
| 1   | 0.91121 | 0.042 | 1.241 | 0.037 | 1.233682442 | 0.1023 |
| 2   | 0.69066 | 0.026 | 1.502 | 0.123 | 1.624991596 | 0.1185 |
| 3   | 0.53919 | 0.059 | 1.809 | 0.156 | 1.818258886 | 0.2114 |
| 7   | 0.26291 | 0.035 | 2.972 | 0.441 | 3.161214151 | 0.2163 |

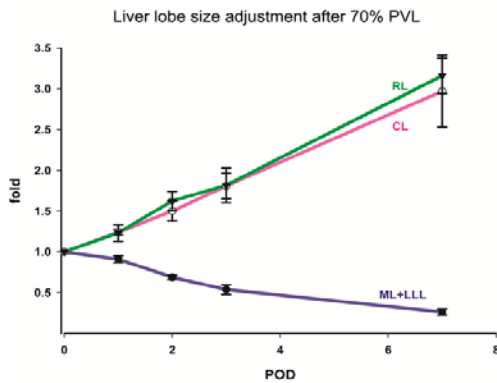

| Group | ob-time(d) | PI of remnant liver lobes |      |      |      | AVE   | AVE(PI) | SD    |
|-------|------------|---------------------------|------|------|------|-------|---------|-------|
|       |            | RSL                       | RIL  | SCL  | ICL  |       |         |       |
| 70%PH | 1          | 0.33                      | 0.34 | 0.24 | 0.25 | 0.290 | 0.263   | 0.049 |
| 70%PH | 1          | 0.35                      | 0.36 | 0.30 | 0.28 | 0.323 |         |       |
| 70%PH | 1          | 0.21                      | 0.20 | 0.22 | 0.20 | 0.208 |         |       |
| 70%PH | 1          | 0.22                      | 0.21 | 0.21 | 0.2  | 0.210 |         |       |
| 70%PH | 1          | 0.28                      | 0.25 | 0.25 | 0.21 | 0.248 |         |       |
| 70%PH | 1          | 0.33                      | 0.34 | 0.26 | 0.27 | 0.300 |         |       |
| 70%PH | 2          | 0.08                      | 0.08 | 0.07 | 0.06 | 0.073 | 0.065   | 0.005 |
| 70%PH | 2          | 0.09                      | 0.07 | 0.06 | 0.02 | 0.060 |         |       |
| 70%PH | 2          | 0.07                      | 0.07 | 0.05 | 0.07 | 0.065 |         |       |
| 70%PH | 2          | 0.07                      | 0.07 | 0.06 | 0.06 | 0.065 |         |       |
| 70%PH | 2          | 0.06                      | 0.06 | 0.06 | 0.06 | 0.060 |         |       |
| 70%PH | 2          | 0.08                      | 0.07 | 0.06 | 0.07 | 0.070 |         |       |
| 70%PH | 3          | 0.07                      | 0.06 | 0.05 | 0.05 | 0.058 | 0.041   | 0.018 |
| 70%PH | 3          | 0.04                      | 0.04 | 0.03 | 0.04 | 0.038 |         |       |
| 70%PH | 3          | 0.03                      | 0.04 | 0.03 | 0.02 | 0.030 |         |       |
| 70%PH | 3          | 0.06                      | 0.05 | 0.08 | 0.07 | 0.065 |         |       |
| 70%PH | 3          | 0.04                      | 0.04 | 0.03 | 0.04 | 0.038 |         |       |
| 70%PH | 3          | 0.02                      | 0.02 | 0.01 | 0.02 | 0.018 |         |       |
| 70%PH | 7          | 0                         | 0    | 0    | 0    | 0.000 | 0.000   | 0.000 |
| 70%PH | 7          | 0                         | 0    | 0    | 0    | 0.000 |         |       |
| 70%PH | 7          | 0                         | 0    | 0    | 0    | 0.000 |         |       |
| 70%PH | 7          | 0                         | 0    | 0    | 0    | 0.000 |         |       |
| 70%PH | 7          | 0                         | 0    | 0    | 0    | 0.000 |         |       |
| 70%PH | 7          | 0                         | 0    | 0    | 0    | 0.000 |         |       |

| POD | PI    |       | PI%  |     |
|-----|-------|-------|------|-----|
|     | AVE1  | SD1   |      |     |
| 1   | 0.263 | 0.049 | 26.3 | 4.9 |
| 2   | 0.065 | 0.005 | 6.5  | 0.5 |
| 3   | 0.041 | 0.018 | 4.1  | 1.8 |
| 7   | 0.000 | 0.000 | 0    | 0   |

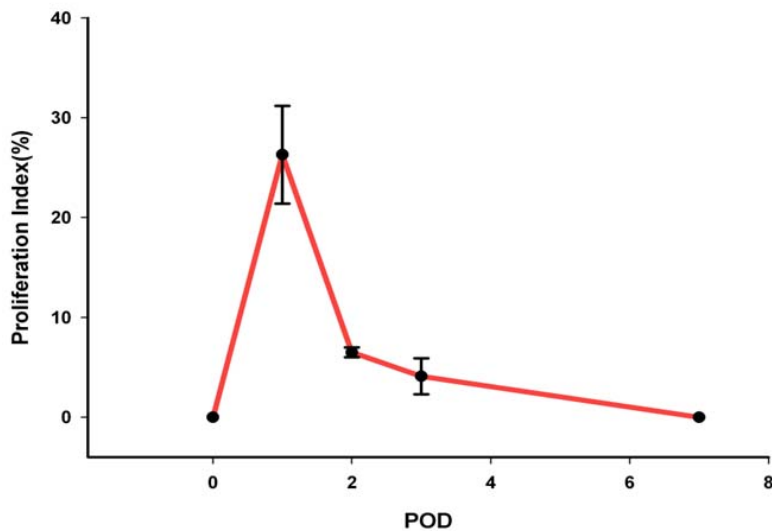

Graph produced by Sigmaplot 10.0
